# Supplementary material
Source: PubMed Central journal article supplement (PMC6494445)
Supplement: NIHMS1521524-supplement-1.pdf [file NIHMS1521524-supplement-1.pdf]

Supplementary Figure S1: Scatter plot of tumor-liver ratio of mean SUV (TLRSUVmean) by high vs. low FCh uptake.

## Fit Group

### Oneway Analysis of TLRSUVmean By FCh Uptake

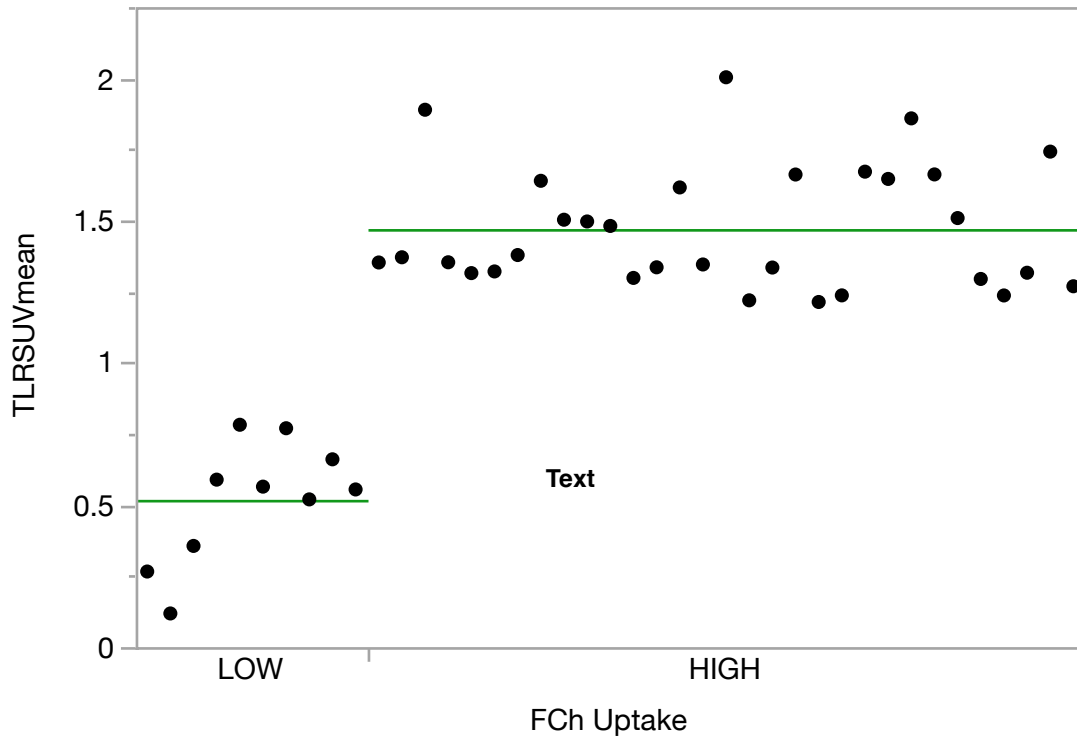

### Means and Std Deviations

| Level | Number | Mean      | Std Dev   | Std Err Mean | Lower 95% |
|-------|--------|-----------|-----------|--------------|-----------|
| LOW   | 10     | 0.5177594 | 0.2137451 | 0.0675921    | 0.3648554 |
| HIGH  | 31     | 1.4698062 | 0.215297  | 0.0386685    | 1.3908347 |

### t Test

HIGH-LOW

Assuming unequal variances

|              |         |           |          |
|--------------|---------|-----------|----------|
| Difference   | 0.95205 | t Ratio   | 12.22589 |
| Std Err Dif  | 0.07787 | DF        | 15.36147 |
| Upper CL Dif | 1.11769 | Prob >  t | <.0001*  |
| Lower CL Dif | 0.78641 | Prob > t  | <.0001*  |
| Confidence   | 0.95    | Prob < t  | 1.0000   |
